# Supplementary material for: Mapping the sensory perception of apple using descriptive sensory evaluation in a genome wide association study
Source: PLOS journal article supplement (doi:10.1371/journal.pone.0171710), 2017-02-23
Supplement: S2 (10.1371/journal.pone.0171710.s002) [file journal.pone.0171710.s002]

**S1 Table. Linkage disequilibrium decay summary and SNP distribution by chromosome for 85 apple cultivars.**

| Chromosome<br>Number | LD decay (kb) <sup>A</sup> | Chromosome<br>length (kb) | # of SNPs | Average distance<br>between SNPs (kb) |
|----------------------|----------------------------|---------------------------|-----------|---------------------------------------|
| 1                    | 75.0                       | 29,390                    | 2,575     | 11.4                                  |
| 2                    | 39.5                       | 36,519                    | 3,712     | 9.8                                   |
| 3                    | 48.8                       | 34,035                    | 3,060     | 11.1                                  |
| 4                    | 68.7                       | 23,056                    | 2,421     | 9.5                                   |
| 5                    | 51.7                       | 31,643                    | 3,325     | 9.5                                   |
| 6                    | 61.5                       | 25,525                    | 2,325     | 11.0                                  |
| 7                    | 128.2                      | 26,629                    | 2,599     | 10.2                                  |
| 8                    | 21.5                       | 29,751                    | 2,720     | 10.9                                  |
| 9                    | 25.8                       | 33,775                    | 3,673     | 9.2                                   |
| 10                   | 34.8                       | 33,492                    | 3,908     | 8.6                                   |
| 11                   | 38.8                       | 35,328                    | 3,461     | 10.2                                  |
| 12                   | 44.1                       | 31,722                    | 3,141     | 10.1                                  |
| 13                   | 122.0                      | 34,925                    | 3,382     | 10.3                                  |
| 14                   | 61.4                       | 29,326                    | 2,450     | 12.0                                  |
| 15                   | 74.7                       | 47,455                    | 4,636     | 10.2                                  |
| 16                   | 82.6                       | 20,870                    | 2,228     | 9.4                                   |
| 17                   | 13.5                       | 24,926                    | 2,824     | 8.8                                   |
| <b>Average</b>       | 58.4                       | 31,080                    | 3,085     | 10.1                                  |

<sup>A</sup> LD decay extents were estimated at  $r^2 = 0.2$ . Chromosome length estimates were obtained from the apple reference genome *Malus x domestica* v3.0.a1.
